# Supplementary material
Source: PubMed Central journal article supplement (PMC9013724)
Supplement: NIHMS1742486-supplement-1.pdf [file NIHMS1742486-supplement-1.pdf]

| <b>Supplemental Table 1: Baseline characteristics of 75,624 WHI study participants included in survival analyses, by birthweight category</b> |                              |                                         |                                              |                               |                      |
|-----------------------------------------------------------------------------------------------------------------------------------------------|------------------------------|-----------------------------------------|----------------------------------------------|-------------------------------|----------------------|
|                                                                                                                                               | <b>&lt; 6 lbs. (n=6,300)</b> | <b>6 lbs–7 lbs<br/>15oz. (n=51,385)</b> | <b>8 lbs.-9 lbs.<br/>15oz<br/>(n=15,314)</b> | <b>≥10 lbs.<br/>(n=2,625)</b> | <b>P<sup>b</sup></b> |
| Age at baseline (mean, STD)                                                                                                                   | 62.9 (7.5)                   | 63.2 (7.3)                              | 63.4 (7.3)                                   | 65.0 (7.0)                    | <0.0001              |
| Race/ethnicity                                                                                                                                |                              |                                         |                                              |                               |                      |
| White                                                                                                                                         | 4,918 (78.3)                 | 43,612 (85.1)                           | 13,631 (89.3)                                | 2,324 (88.9)                  | <0.0001              |
| Black                                                                                                                                         | 640 (10.2)                   | 3,840 (7.5)                             | 866 (5.7)                                    | 155 (5.9)                     |                      |
| Asian/Pacific islander                                                                                                                        | 316 (5.0)                    | 1,326 (2.6)                             | 165 (1.1)                                    | 21 (0.8)                      |                      |
| Hispanic                                                                                                                                      | 301 (4.8)                    | 1,756 (3.4)                             | 410 (2.7)                                    | 68 (2.6)                      |                      |
| Other/unknown                                                                                                                                 | 108 (1.7)                    | 725 (1.4)                               | 192 (1.3)                                    | 47 (1.8)                      |                      |
| Education                                                                                                                                     |                              |                                         |                                              |                               |                      |
| < High school diploma/GED                                                                                                                     | 1,433 (23.0)                 | 10,066 (19.7)                           | 2,900 (19.1)                                 | 645 (24.9)                    | <0.0001              |
| School after high school                                                                                                                      | 3,041 (48.7)                 | 24,730 (48.5)                           | 7,333 (48.3)                                 | 1,279 (49.3)                  |                      |
| College degree or higher                                                                                                                      | 1,765 (28.3)                 | 16,225 (31.8)                           | 4,955 (32.6)                                 | 672 (25.9)                    |                      |
| Normalized socioeconomic status (NSES; mean, STD)                                                                                             | 75.3 (9.1)                   | 76.3 (8.4)                              | 76.5 (8.0)                                   | 75.4 (8.3)                    | <0.0001              |
| BMI at baseline (mean, STD)                                                                                                                   | 27.2 (6.0)                   | 27.0 (5.7)                              | 27.7 (6.1)                                   | 28.6 (6.6)                    | <0.0001              |
| Smoking status                                                                                                                                |                              |                                         |                                              |                               |                      |
| Never                                                                                                                                         | 3,276 (52.8)                 | 25,638 (50.5)                           | 7,362 (48.7)                                 | 1,278 (49.4)                  | <0.0001              |
| Past                                                                                                                                          | 2,484 (40.0)                 | 22,009 (43.4)                           | 6,782 (44.8)                                 | 1,136 (44.0)                  |                      |
| Current                                                                                                                                       | 445 (7.2)                    | 3,079 (6.1)                             | 981 (6.5)                                    | 171 (6.6)                     |                      |
| Alcohol use                                                                                                                                   |                              |                                         |                                              |                               |                      |
| Non-drinker                                                                                                                                   | 820 (13.1)                   | 5,292 (10.4)                            | 1,472 (9.7)                                  | 308 (11.8)                    | <0.0001              |
| Past drinker/average drinker                                                                                                                  | 3,300 (52.7)                 | 25,478 (49.9)                           | 7,595 (49.9)                                 | 1,334 (51.2)                  |                      |
| Current drinker                                                                                                                               | 2,141 (34.2)                 | 20,313 (39.8)                           | 6,152 (40.4)                                 | 962 (36.9)                    |                      |
| Any thyroid condition                                                                                                                         |                              |                                         |                                              |                               |                      |
| Yes                                                                                                                                           | 712 (11.9)                   | 5,700 (11.5)                            | 1,654 (11.2)                                 | 332 (13.3)                    | 0.02                 |
| No                                                                                                                                            | 5,289 (88.1)                 | 43,784 (88.5)                           | 13,120 (88.8)                                | 2,161 (86.7)                  |                      |
| Any autoimmune condition                                                                                                                      |                              |                                         |                                              |                               |                      |
| Yes                                                                                                                                           | 97 (1.5)                     | 787 (1.5)                               | 222 (1.5)                                    | 55 (2.1)                      | 0.10                 |
| No                                                                                                                                            | 6,203 (98.5)                 | 50,598 (98.5)                           | 15,092 (98.6)                                | 2,570 (97.9)                  |                      |

Numbers are N (%) for categorical variables or mean (standard deviation) for continuous variables.  
<sup>a</sup> P-values are from t-tests and chi-square statistics and compare women with “any autoimmune” condition to the women with “no autoimmune” condition (among those use in this analysis).  
<sup>b</sup> P-values are from t-tests and chi-square statistics and compare women with “any thyroid” condition to the women with “no thyroid” condition (among those use in this analysis).
